# Supplementary material for: Identification of Survival-Related Genes in Acute Myeloid Leukemia (AML) Based on Cytogenetically Normal AML Samples Using Weighted Gene Coexpression Network Analysis
Source: Hindawi journal article supplement (doi:10.1155/2022/5423694), 2022-09-29

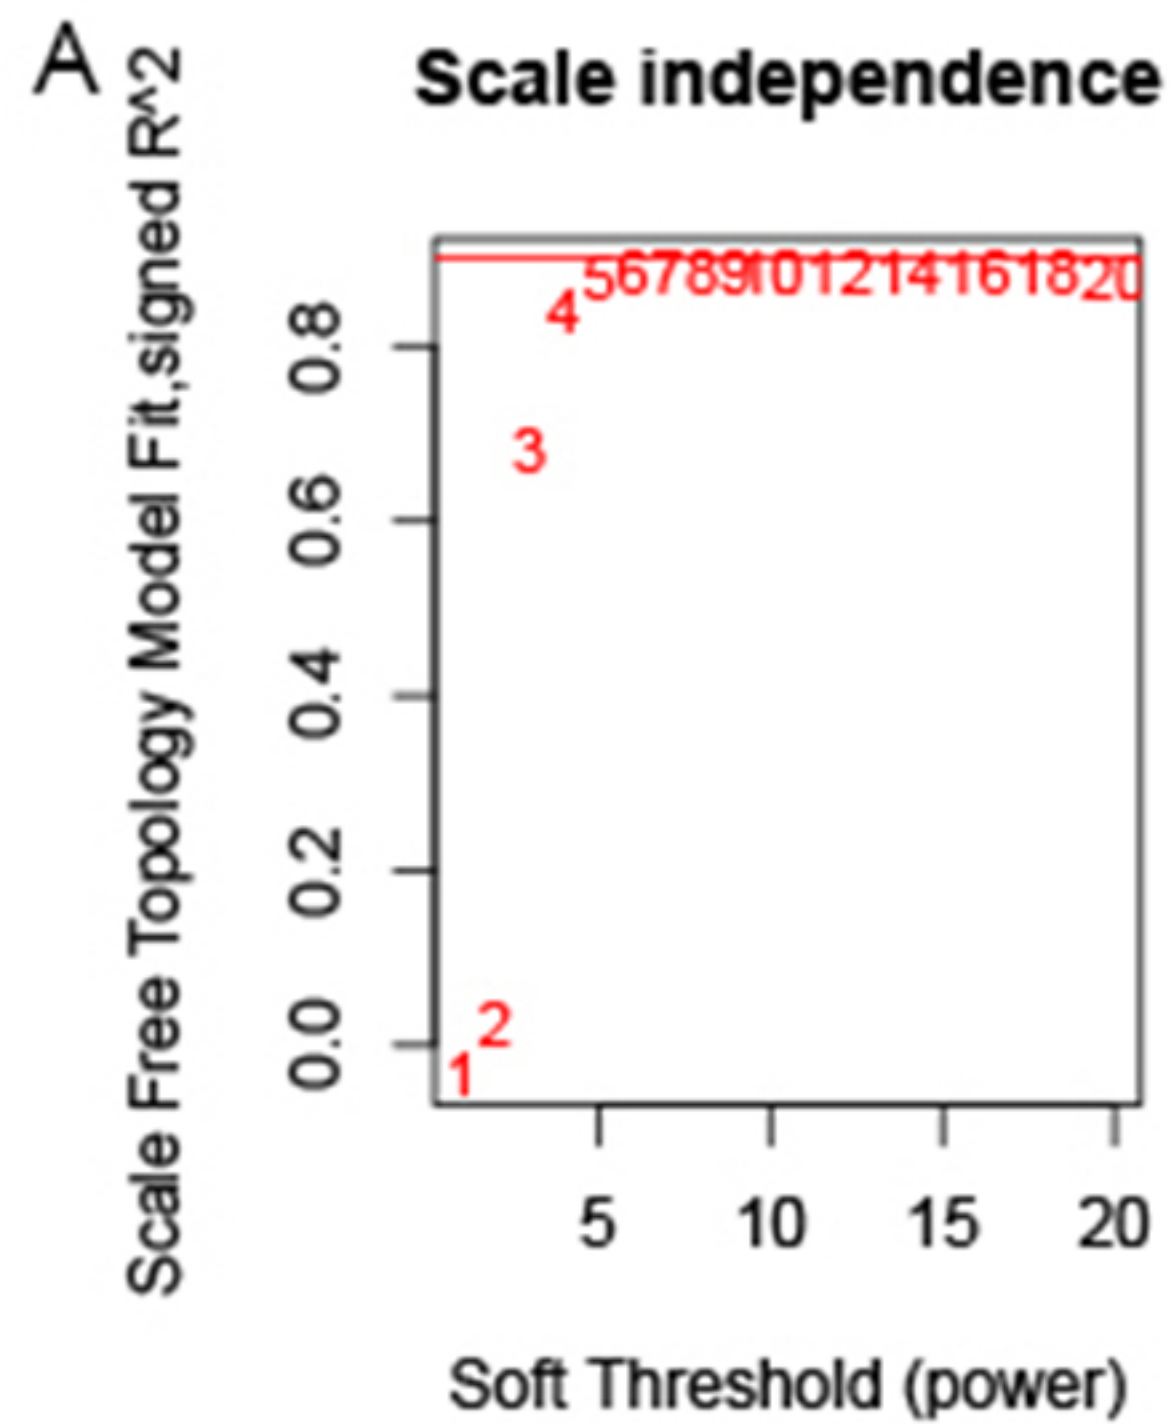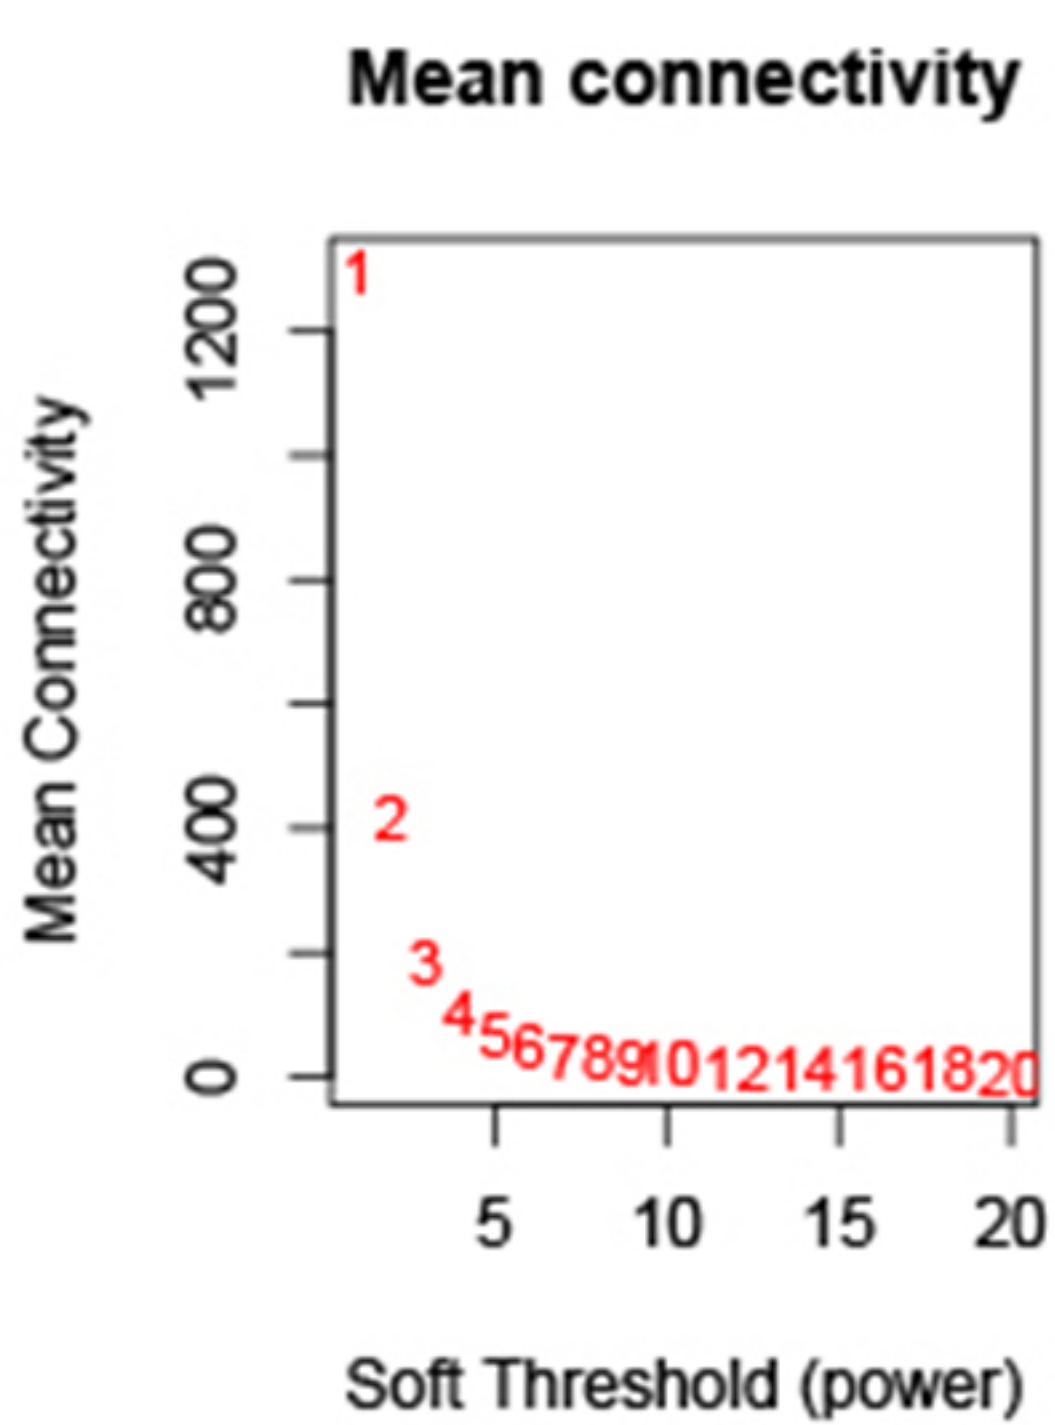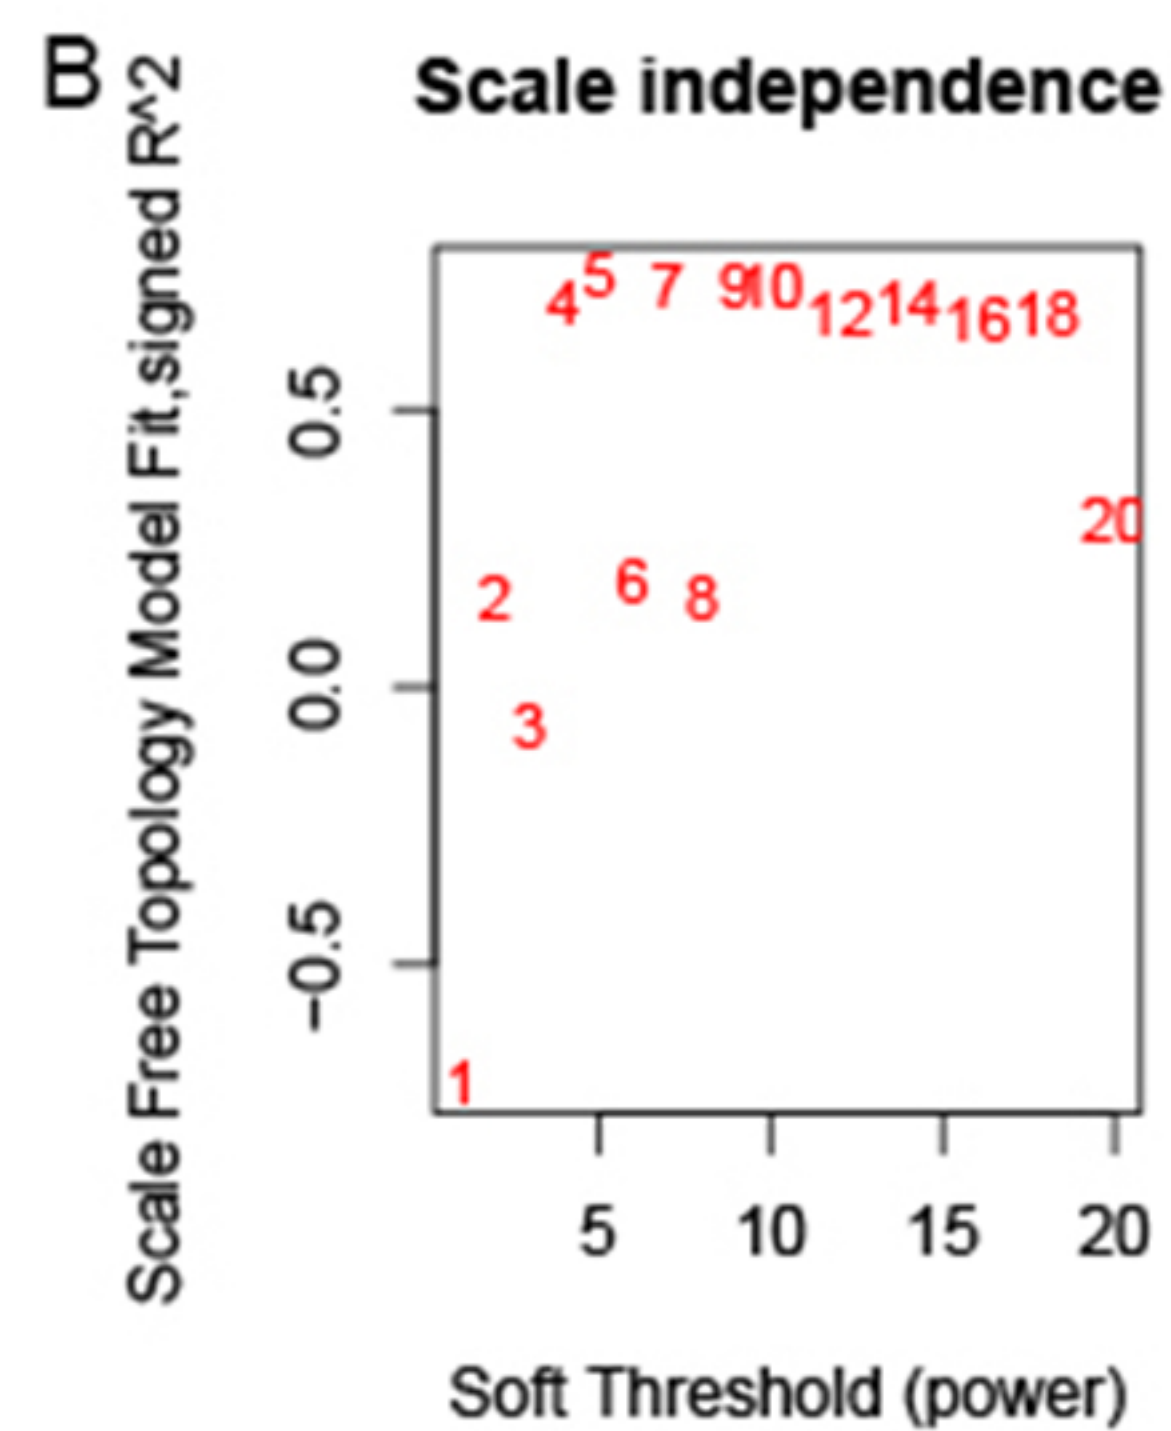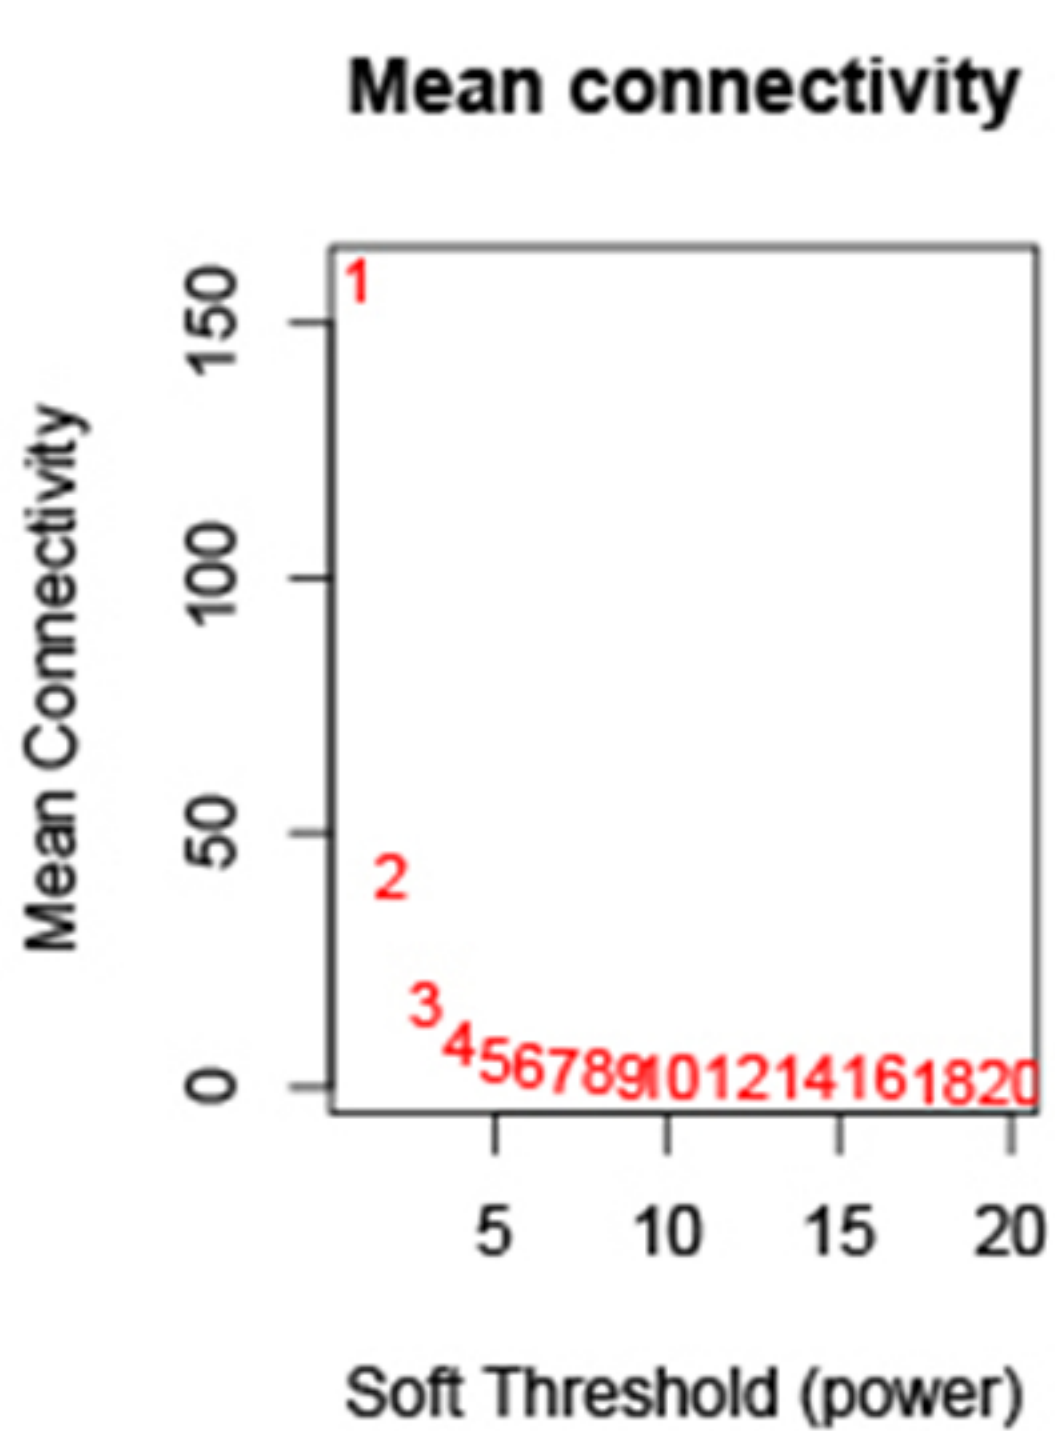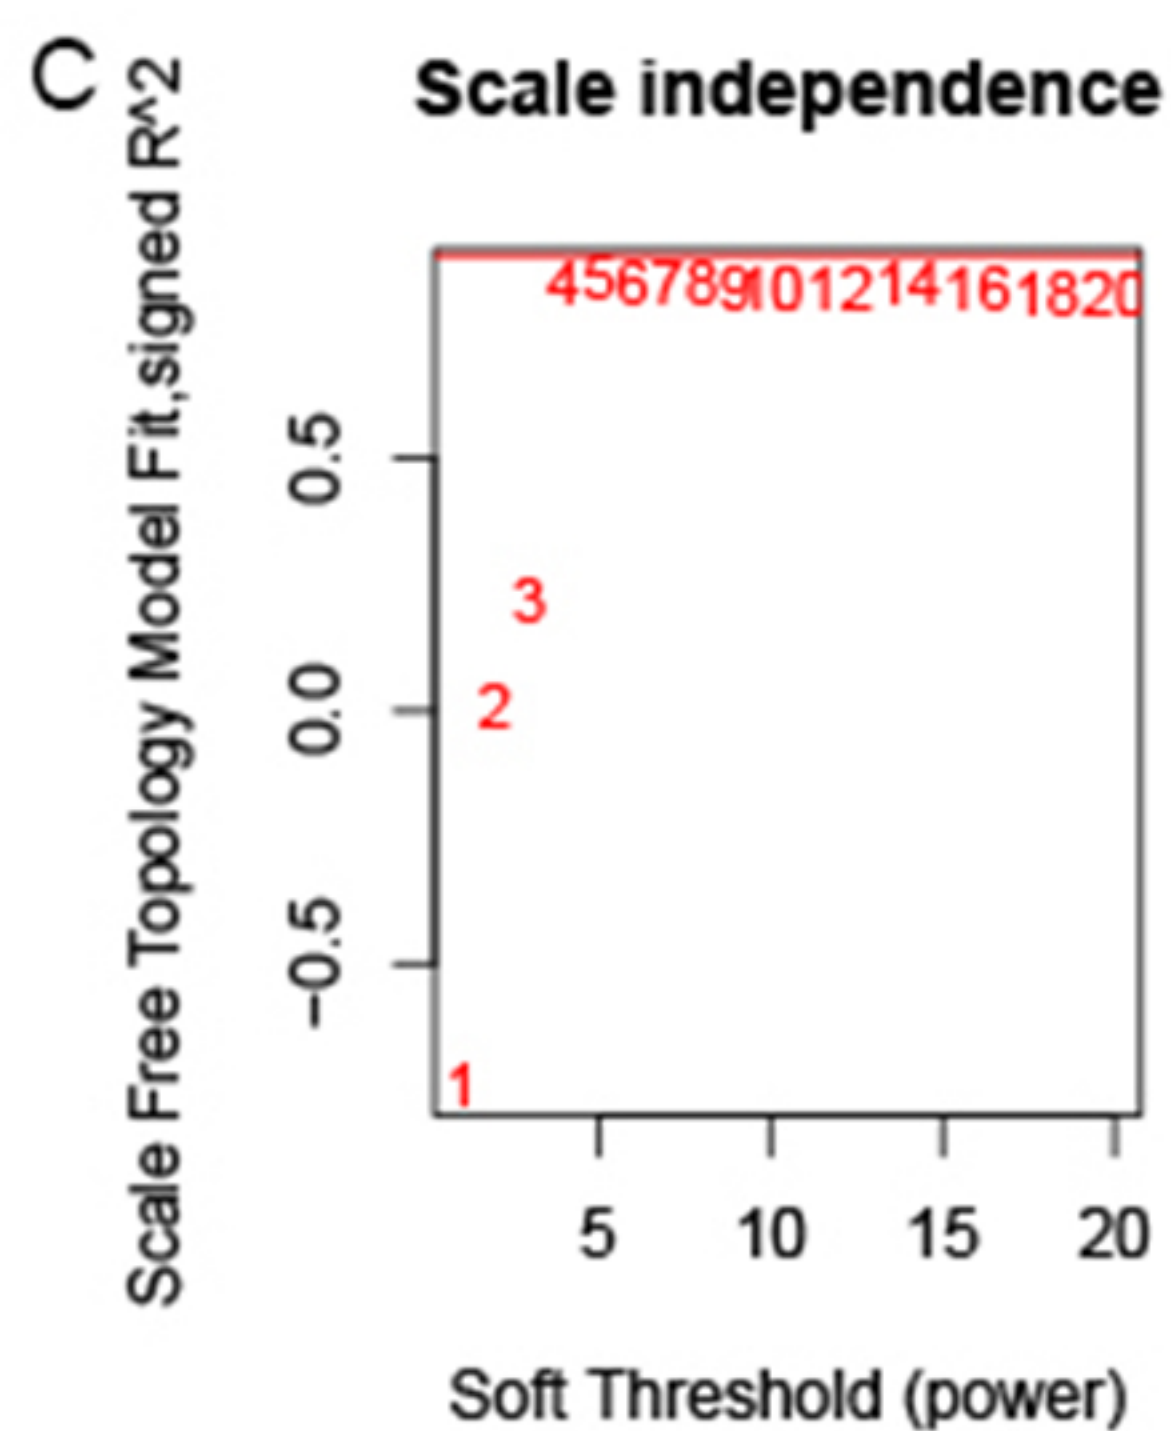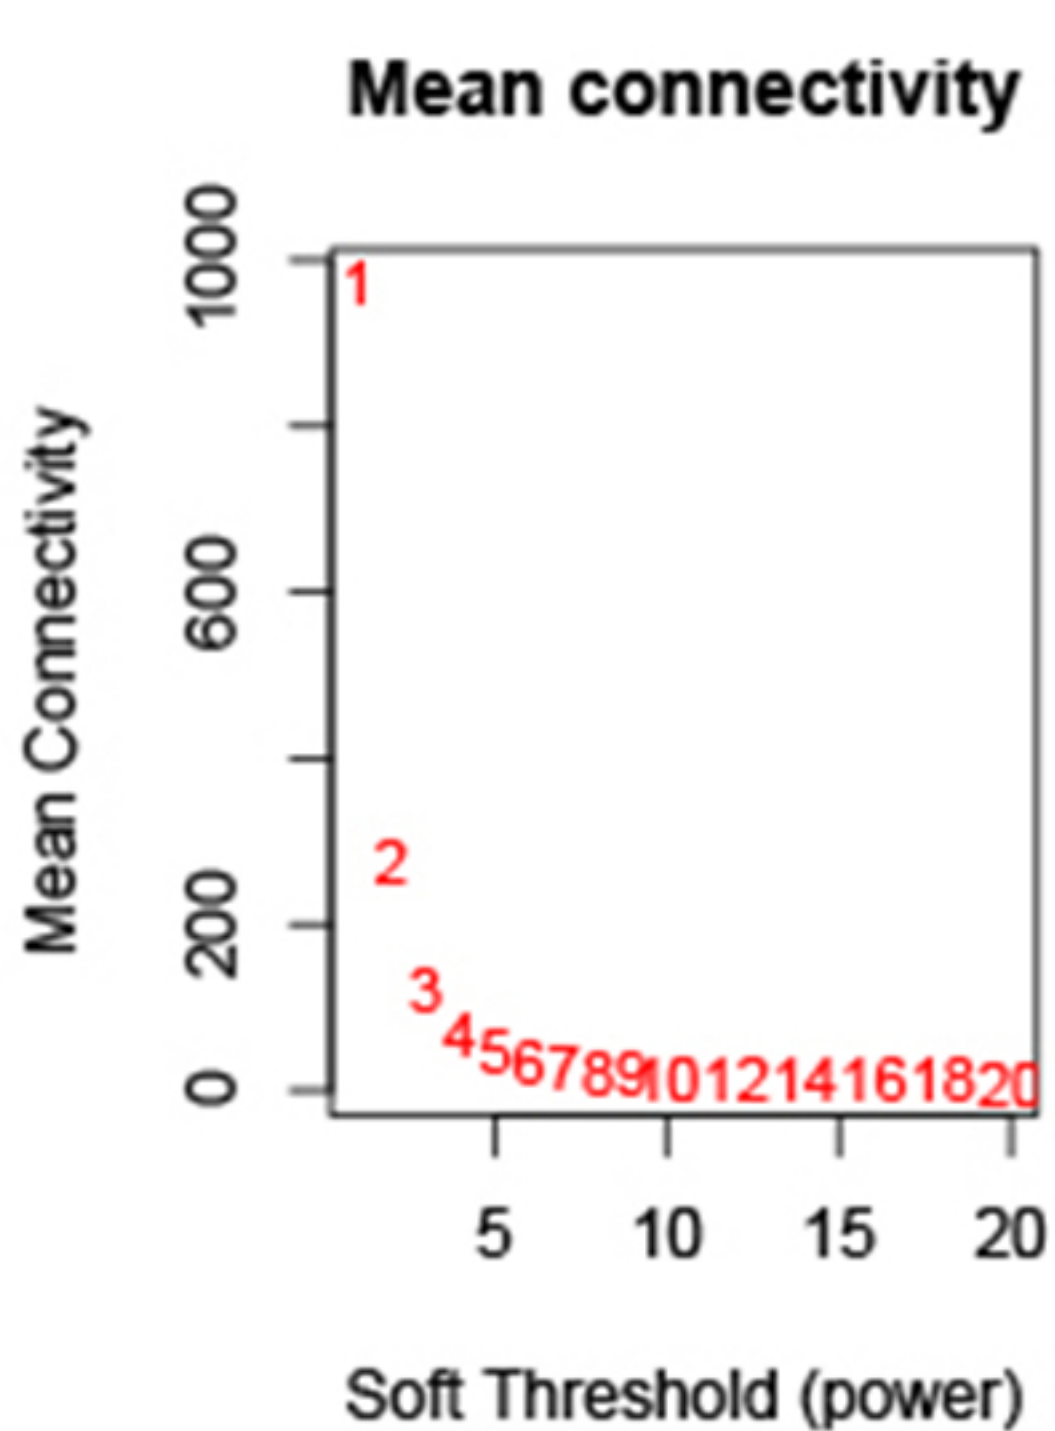

Supplement: f3 [file 5423694.f3.pdf]
