# Supplementary material for: Identification of Survival-Related Genes in Acute Myeloid Leukemia (AML) Based on Cytogenetically Normal AML Samples Using Weighted Gene Coexpression Network Analysis
Source: Hindawi journal article supplement (doi:10.1155/2022/5423694), 2022-09-29

**A** Module membership vs, gene significance in ME1

cor=0.57, p=1.2e-12

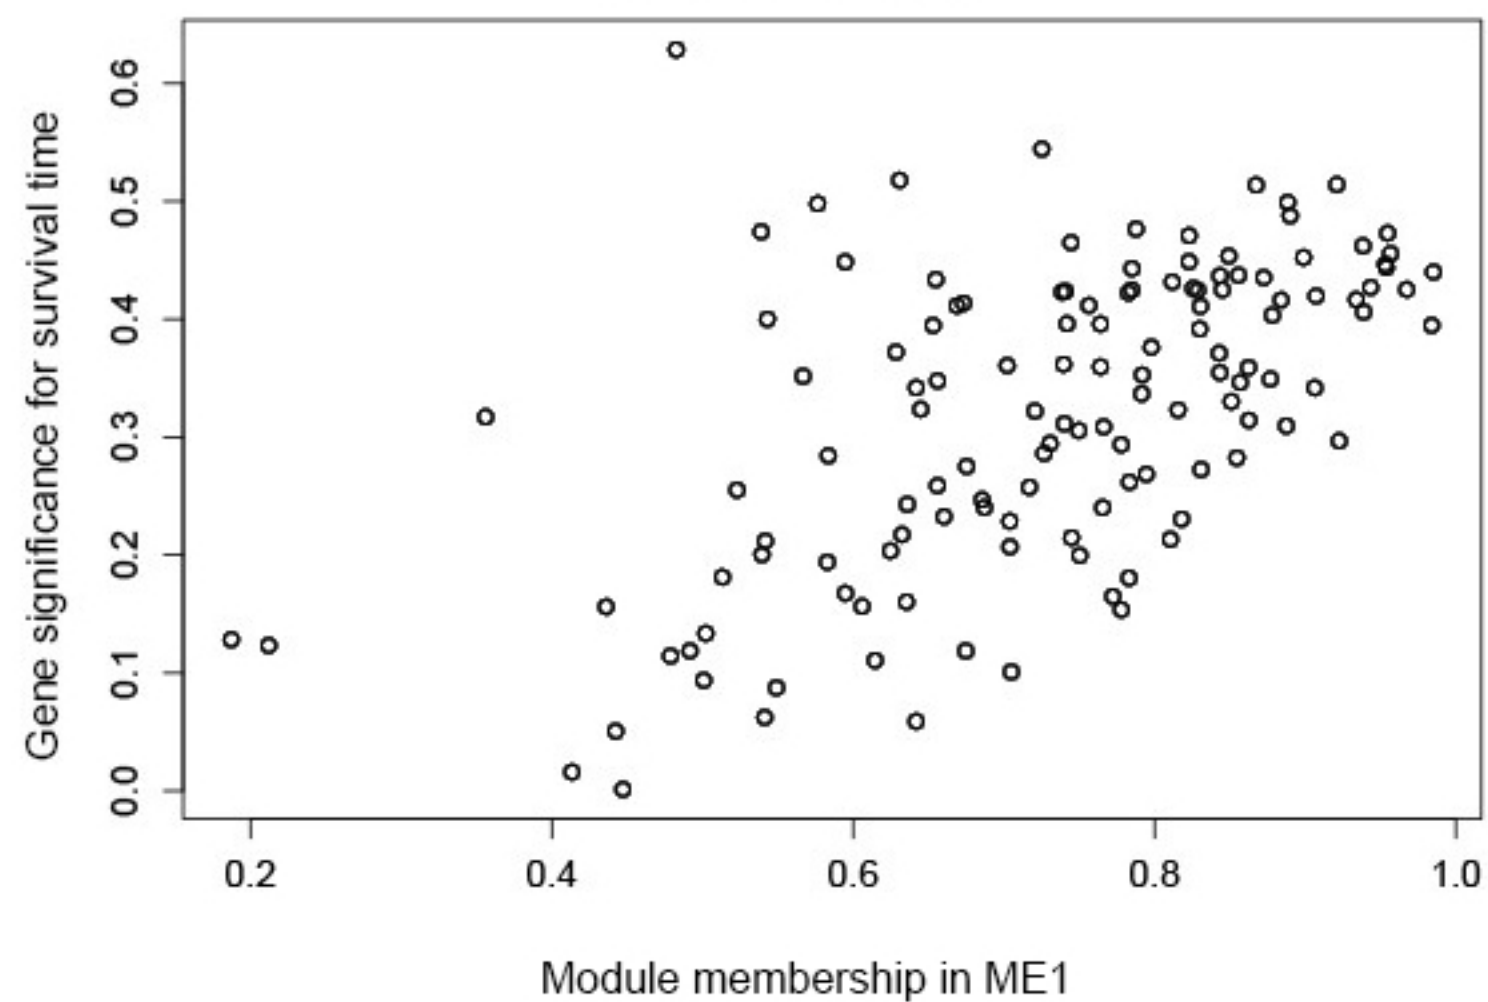

**B** Module membership vs, gene significance in ME2

cor=0.72, p=4.9e-38

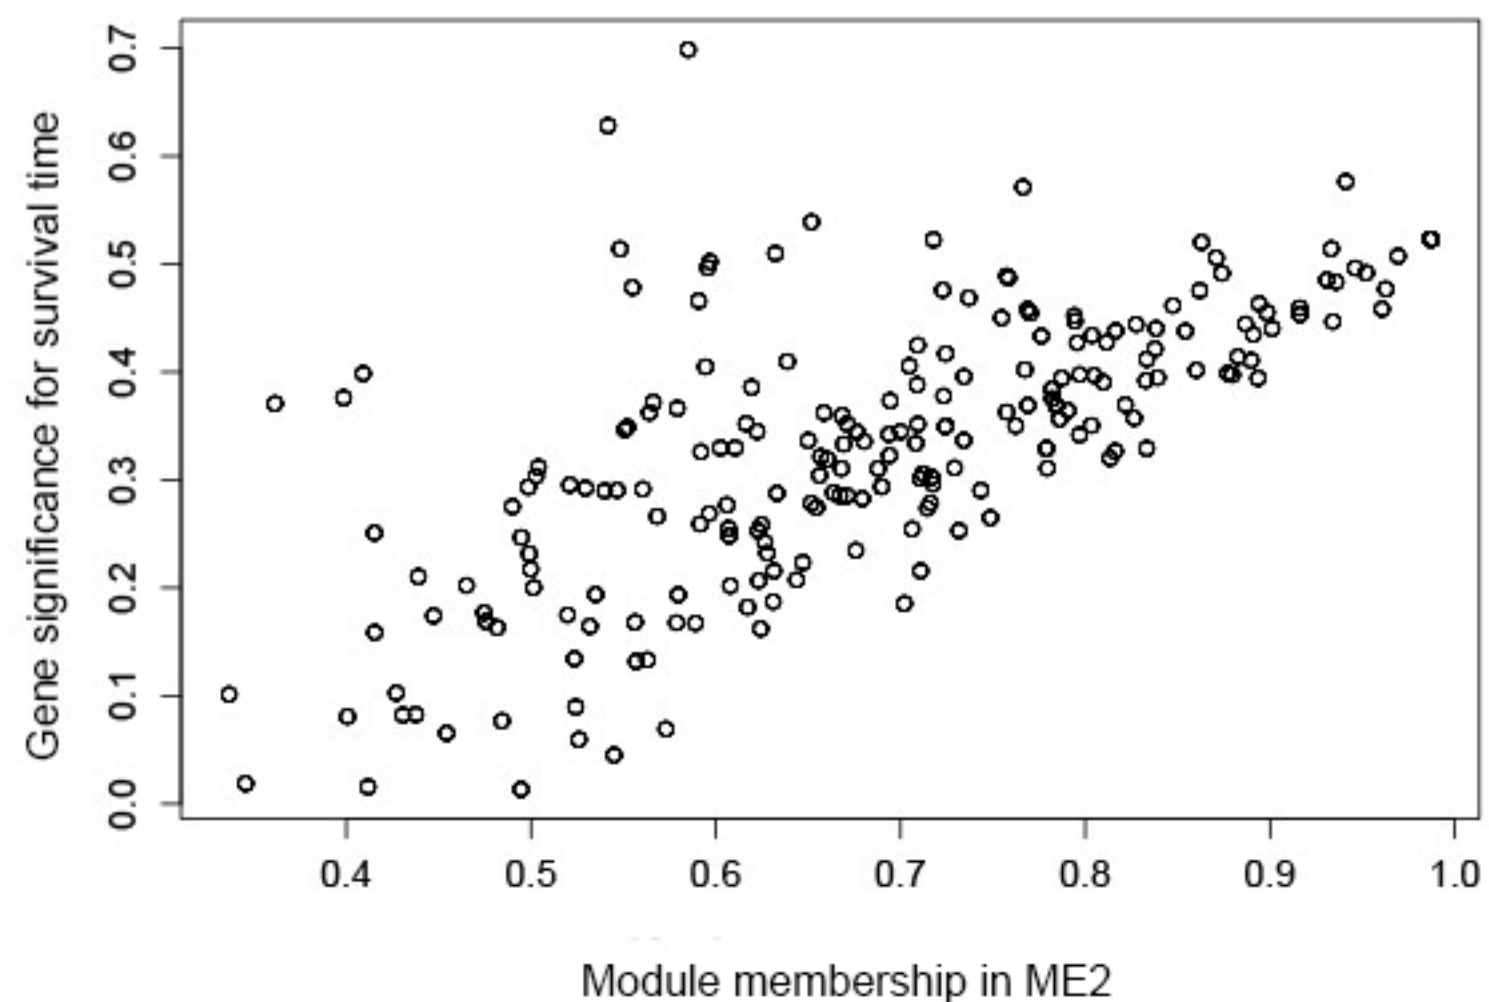

**C** Module membership vs, gene significance in ME3

cor=0.46, p=4.5e-15

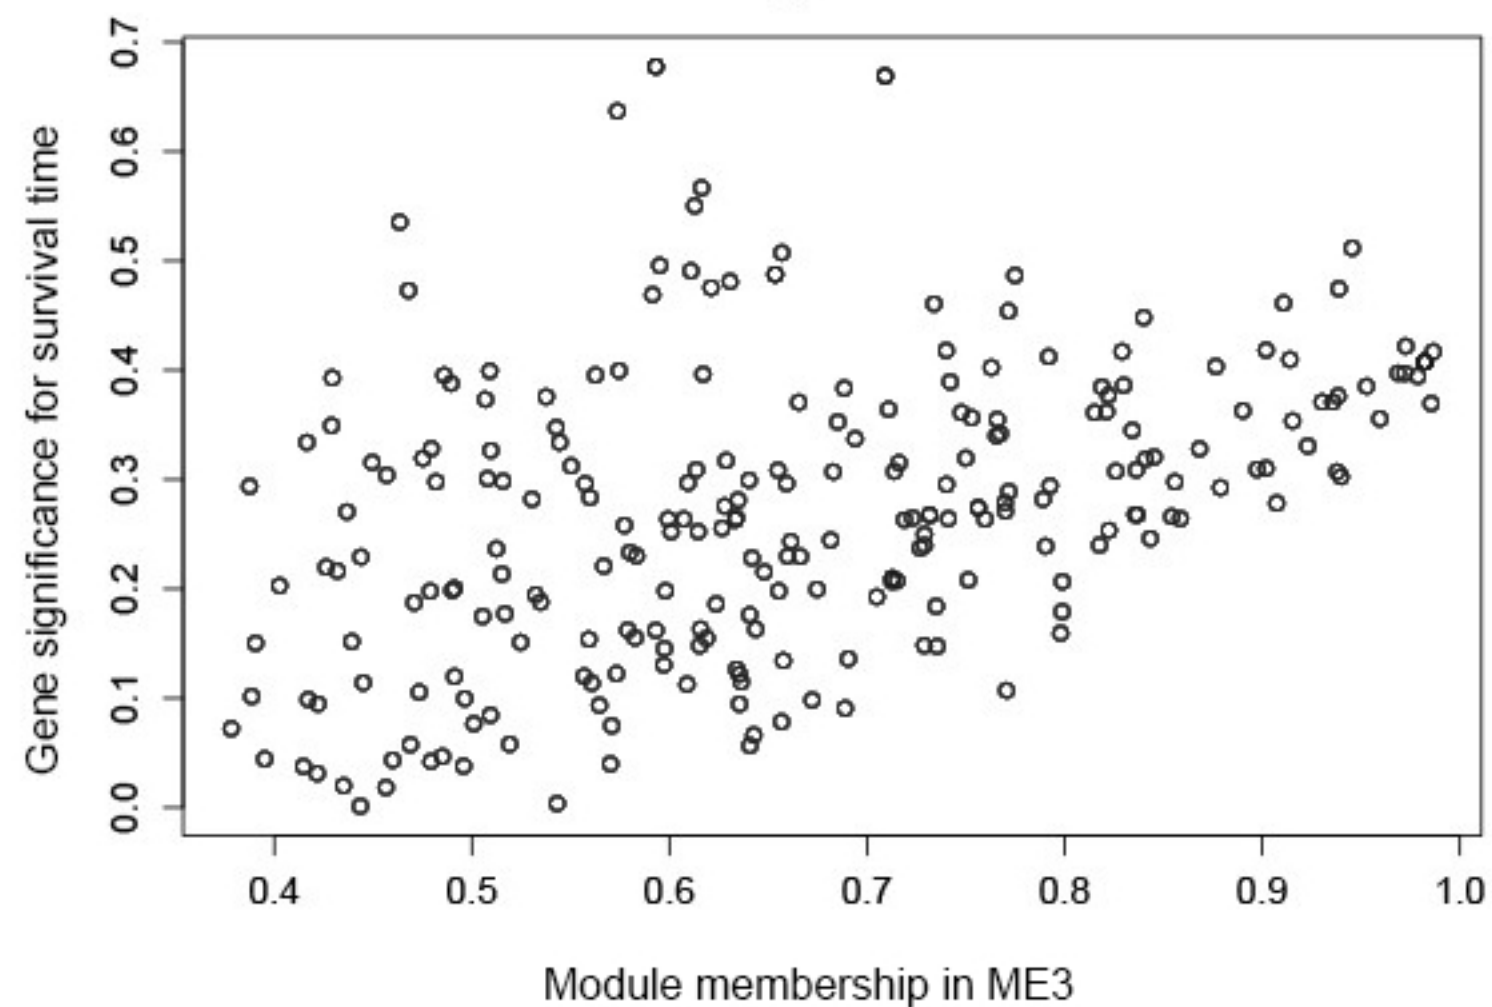

**D** Module membership vs, gene significance in ME4

cor=0.71, p=4e-14

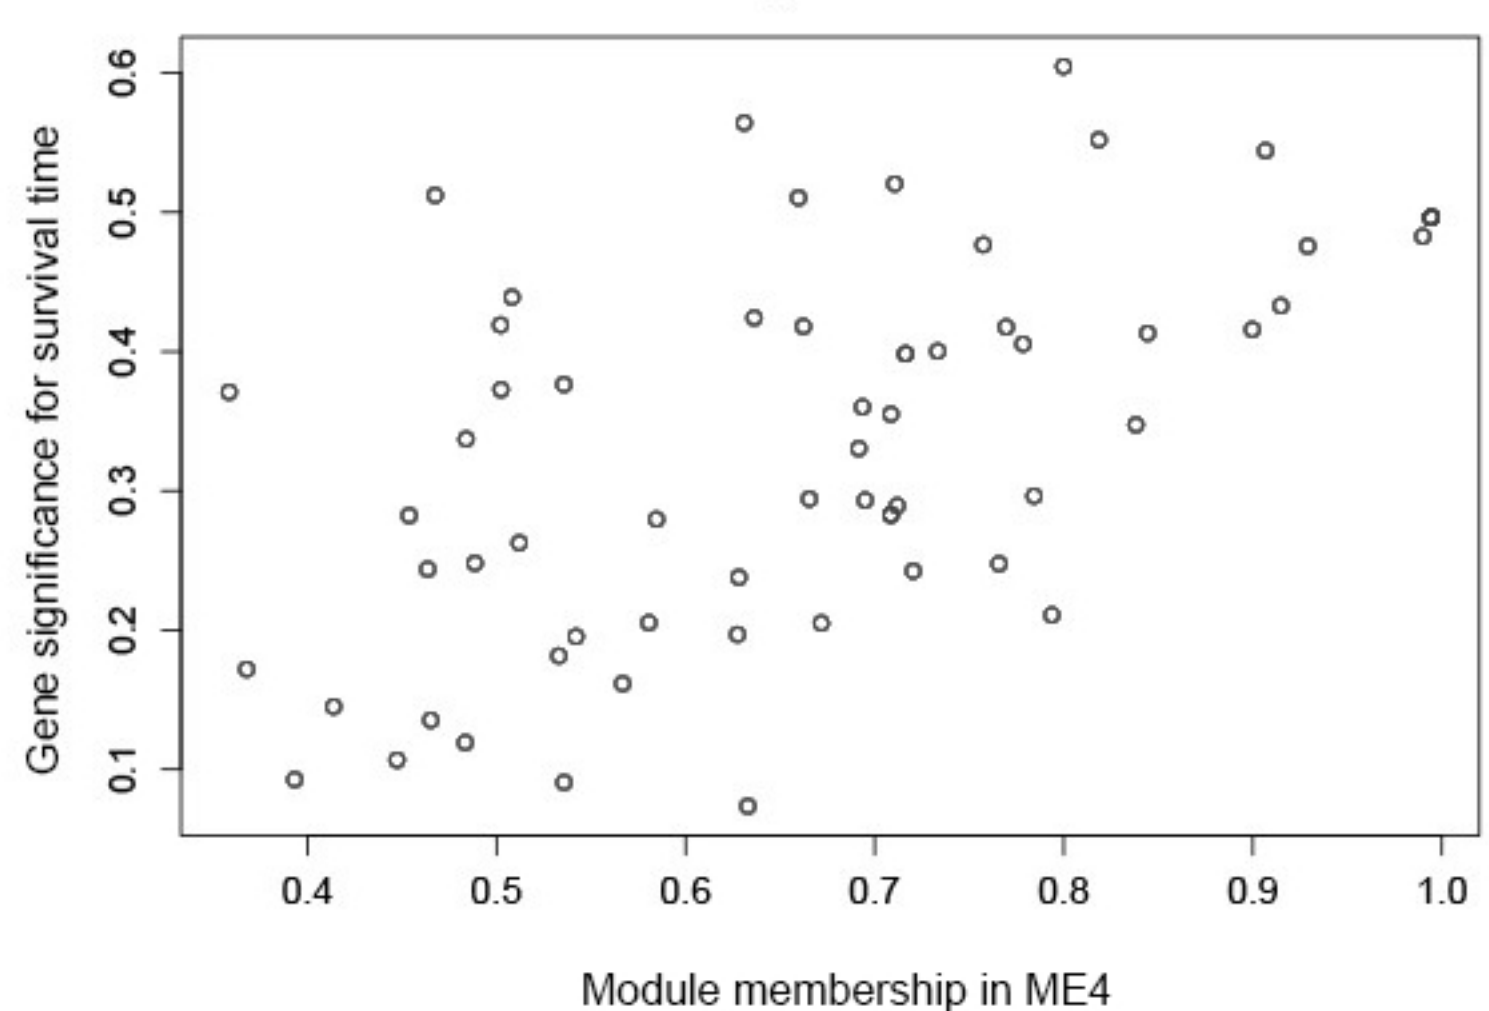

Supplement: f4 [file 5423694.f4.pdf]
